# Supplementary material
Source: MDPI journal article supplement (https://www.mdpi.com/2072-4292/7/4/3446)
Supplement: s1 [file s1]

Supplementary material to the Article

Airborne Lidar for Woodland Habitat Quality Monitoring: Exploring the Significance of Lidar Data Characteristics when Modelling Organism–Habitat Relationships

Ross A. Hill 1,* and Shelley A. Hinsley 2

**Table S1.** Breeding data for great tits in occupied nest boxes in Monks Wood for the years 1997 and 2001.

| **Nest Box No.** | **1997** | | **2001** | |
| --- | --- | --- | --- | --- |
| **No. of Nestlings** | **Mean Body Mass (g)** | **No. of Nestlings** | **Mean Body Mass (g)** |
| 2 | - | - | 10 | 17.4 |
| 4 | - | - | 10 | 17.1 |
| 6 | 7 | 17.0 | 9 | 17.1 |
| 10 | 8 | 19.0 | 8 | 17.3 |
| 11 | - | - | 10 | 18.2 |
| 12 | 10 | 16.8 | 9 | 18.6 |
| 13 | 11 | 17.8 | - | - |
| 16 | 9 | 16.1 | - | - |
| 17 | - | - | 10 | 19.9 |
| 18 | - | - | 8 | 18.2 |
| 19 | 12 | 17.0 | 7 | 17.7 |
| 20 | 12 | 16.5 | 8 | 18.7 |
| 21 | 9 | 17.5 | 9 | 18.6 |
| Mean | 9.8 | 17.2 | 8.9 | 18.1 |

**Table S2.** Sample sizes for the 2012 point cloud data extracted for each nest box (first return and all returns).

| **Nest Box No.** | **First Returns (FR)** | **All Returns (AR)** |
| --- | --- | --- |
| 2 | 42,219 | 28,039 |
| 4 | 27,970 | 18,406 |
| 6 | 28,028 | 17,776 |
| 10 | 22,351 | 14,793 |
| 11 | 47,471 | 34,499 |
| 12 | 21,840 | 14,866 |
| 13 | 22,291 | 14,562 |
| 16 | 58,551 | 41,836 |
| 17 | 41,477 | 31,800 |
| 18 | 43,581 | 29,697 |
| 19 | 11,356 | 6968 |
| 20 | 28,034 | 20,164 |
| 21 | 10,146 | 6298 |

**Table S3.** Mean canopy height (in metres) per occupied nest box as extracted from Canopy Height Models (CHM) acquired in 2000, 2005 and 2012, and from 2012 point cloud data (first return (FR) and all returns (AR)).

| **Nest Box No.** | **2000 CHM** | | | **2005 CHM** | | | **2012 CHM** | | | **2012 Point Cloud (FR)** | | | **2012 Point Cloud (AR)** | | |
| --- | --- | --- | --- | --- | --- | --- | --- | --- | --- | --- | --- | --- | --- | --- | --- |
| **Hmean** | **Hmean > 2 m** | **Hmean > 8 m** | **Hmean** | **Hmean > 2 m** | **Hmean > 8 m** | **Hmean** | **Hmean > 2 m** | **Hmean > 8 m** | **Hmean** | **Hmean > 2 m** | **Hmean > 8 m** | **Hmean** | **Hmean > 2 m** | **Hmean > 8 m** |
| 2 | 16.43 | 16.41 | 16.66 | 18.62 | 18.63 | 18.67 | 19.30 | 19.33 | 19.40 | 18.23 | 18.48 | 18.79 | 14.60 | 16.04 | 17.53 |
| 4 | 16.08 | 16.14 | 16.48 | 17.79 | 17.82 | 18.17 | 18.51 | 18.55 | 18.84 | 17.62 | 17.74 | 18.25 | 14.30 | 15.26 | 17.02 |
| 6 | 15.54 | 15.50 | 15.62 | 16.75 | 16.76 | 16.81 | 17.56 | 17.58 | 17.65 | 16.70 | 16.89 | 17.24 | 12.72 | 14.43 | 16.26 |
| 10 | 15.86 | 15.92 | 16.17 | 17.03 | 17.12 | 17.46 | 17.15 | 17.42 | 17.98 | 16.10 | 16.56 | 17.40 | 12.87 | 14.42 | 16.46 |
| 11 | 11.88 | 12.14 | 13.98 | 13.68 | 13.74 | 14.91 | 14.90 | 15.08 | 15.76 | 14.03 | 14.49 | 15.39 | 12.04 | 13.34 | 14.88 |
| 12 | 13.34 | 13.29 | 13.92 | 15.04 | 15.00 | 15.23 | 16.30 | 16.33 | 16.51 | 15.49 | 15.63 | 16.08 | 12.53 | 13.60 | 15.37 |
| 13 | 12.42 | 12.49 | 13.53 | 14.72 | 14.88 | 15.40 | 15.97 | 16.03 | 16.16 | 15.17 | 15.34 | 15.68 | 12.04 | 13.40 | 14.80 |
| 16 | 10.36 | 10.81 | 13.16 | 11.93 | 12.06 | 13.75 | 12.13 | 12.41 | 14.16 | 11.25 | 11.75 | 13.45 | 9.55 | 10.74 | 13.05 |
| 17 | 5.77 | 7.07 | 10.18 | 6.71 | 7.79 | 10.61 | 7.37 | 8.61 | 11.16 | 6.25 | 8.46 | 11.03 | 5.37 | 7.91 | 10.98 |
| 18 | 11.72 | 11.78 | 12.86 | 12.62 | 12.70 | 13.31 | 13.29 | 13.44 | 14.03 | 12.04 | 12.48 | 13.64 | 9.89 | 11.36 | 13.21 |
| 19 | 14.80 | 14.91 | 15.07 | 16.71 | 16.74 | 16.79 | 17.54 | 17.57 | 17.60 | 16.73 | 16.87 | 17.08 | 12.90 | 14.25 | 15.83 |
| 20 | 11.63 | 11.82 | 13.87 | 12.98 | 13.23 | 14.57 | 14.99 | 15.01 | 15.56 | 14.33 | 14.43 | 15.27 | 12.06 | 13.16 | 14.65 |
| 21 | 13.35 | 13.34 | 14.32 | 14.78 | 14.83 | 15.34 | 16.09 | 16.10 | 16.47 | 15.28 | 15.39 | 16.01 | 11.84 | 13.15 | 15.02 |
| Mean | 13.01 | 13.20 | 14.29 | 14.57 | 14.72 | 15.46 | 15.47 | 16.24 | 16.25 | 14.56 | 14.96 | 15.79 | 11.75 | 13.16 | 15.00 |

**Table S4.** Woodland structure metrics extracted per nest box from the 2012 point cloud data: first returns only

| **Metric Name** | **Box #2** | **Box #4** | **Box #6** | **Box #10** | **Box #11** | **Box #12** | **Box #13** | **Box #16** | **Box #17** | **Box #18** | **Box #19** | **Box #20** | **Box #21** |
| --- | --- | --- | --- | --- | --- | --- | --- | --- | --- | --- | --- | --- | --- |
| Vegetation cover | 98.83 | 99.44 | 98.96 | 97.78 | 97.92 | 99.34 | 99.00 | 97.87 | 77.78 | 97.11 | 99.41 | 99.42 | 99.43 |
| Canopy permeability | 43.52 | 44.52 | 48.71 | 45.04 | 31.02 | 41.48 | 45.98 | 35.50 | 27.34 | 41.15 | 53.54 | 34.39 | 51.33 |
| Canopy closure | 98.61 | 99.34 | 98.86 | 97.16 | 96.70 | 99.13 | 98.90 | 95.47 | 73.13 | 96.38 | 99.18 | 99.30 | 99.30 |
| H5 | 10.48 | 8.37 | 10.56 | 4.35 | 3.63 | 7.79 | 8.24 | 2.25 | 0.00 | 3.28 | 10.77 | 6.60 | 7.00 |
| H10 | 14.30 | 12.98 | 14.65 | 8.33 | 6.96 | 11.44 | 10.40 | 4.04 | 0.00 | 6.45 | 12.97 | 7.99 | 10.55 |
| H15 | 15.69 | 14.93 | 15.57 | 11.13 | 9.03 | 12.85 | 11.95 | 5.33 | 0.00 | 7.49 | 14.21 | 9.12 | 12.63 |
| H20 | 16.70 | 15.78 | 16.05 | 12.81 | 10.30 | 13.59 | 13.39 | 6.65 | 0.13 | 8.25 | 15.26 | 9.98 | 13.62 |
| H25 | 17.35 | 16.48 | 16.37 | 14.01 | 11.21 | 14.16 | 14.37 | 8.23 | 1.47 | 9.26 | 16.04 | 10.72 | 14.34 |
| H30 | 17.75 | 17.18 | 16.62 | 14.89 | 12.16 | 14.65 | 14.99 | 9.14 | 2.92 | 10.01 | 16.51 | 11.50 | 14.91 |
| H35 | 18.11 | 17.66 | 16.84 | 15.72 | 13.03 | 15.07 | 15.43 | 10.23 | 4.10 | 10.67 | 16.86 | 12.24 | 15.38 |
| H40 | 18.49 | 18.04 | 17.03 | 16.77 | 13.90 | 15.42 | 15.74 | 10.90 | 4.98 | 11.39 | 17.17 | 13.00 | 15.77 |
| H45 | 18.88 | 18.38 | 17.23 | 17.47 | 14.71 | 15.78 | 16.01 | 11.54 | 5.91 | 12.00 | 17.42 | 13.95 | 16.06 |
| H50 (Hmedian) | 19.23 | 18.67 | 17.40 | 17.99 | 15.45 | 16.15 | 16.26 | 12.09 | 6.52 | 12.61 | 17.65 | 15.08 | 16.33 |
| H55 | 19.49 | 18.96 | 17.56 | 18.44 | 16.20 | 16.49 | 16.48 | 12.63 | 7.12 | 13.16 | 17.88 | 15.87 | 16.57 |
| H60 | 19.75 | 19.22 | 17.72 | 18.81 | 16.67 | 16.79 | 16.67 | 13.16 | 7.93 | 13.53 | 18.09 | 16.56 | 16.79 |
| H65 | 20.00 | 19.48 | 17.87 | 19.13 | 17.08 | 17.08 | 16.88 | 13.68 | 8.73 | 13.91 | 18.29 | 17.14 | 17.00 |
| H70 | 20.23 | 19.73 | 18.02 | 19.41 | 17.43 | 17.38 | 17.09 | 14.18 | 9.53 | 14.48 | 18.48 | 17.61 | 17.22 |
| H75 | 20.46 | 20.01 | 18.20 | 19.70 | 17.77 | 17.66 | 17.31 | 14.71 | 10.19 | 15.09 | 18.67 | 18.06 | 17.44 |
| H80 | 20.73 | 20.32 | 18.42 | 19.98 | 18.13 | 17.99 | 17.52 | 15.39 | 10.82 | 15.89 | 18.85 | 18.59 | 17.68 |
| H85 | 21.08 | 20.67 | 18.68 | 20.29 | 18.51 | 18.37 | 17.76 | 16.18 | 11.59 | 16.72 | 19.05 | 19.25 | 17.97 |
| H90 | 21.51 | 21.16 | 19.03 | 20.66 | 18.95 | 18.85 | 18.05 | 17.15 | 12.37 | 17.82 | 19.29 | 19.98 | 18.39 |
| H95 | 22.13 | 21.82 | 19.51 | 21.18 | 19.45 | 19.94 | 18.45 | 17.99 | 13.37 | 18.87 | 19.60 | 20.89 | 18.94 |
| H100 (Hmax) | 23.63 | 23.57 | 21.26 | 23.17 | 21.45 | 23.33 | 20.20 | 20.15 | 15.78 | 21.63 | 21.10 | 23.24 | 20.42 |
| Hmean | 18.23 | 17.62 | 16.70 | 16.10 | 14.03 | 15.49 | 15.17 | 11.25 | 6.25 | 12.04 | 16.73 | 14.33 | 15.28 |
| Hstd | 3.85 | 3.94 | 3.17 | 5.12 | 4.86 | 3.60 | 3.39 | 4.47 | 4.61 | 4.54 | 3.13 | 4.64 | 3.51 |
| Hmean > 2 m | 18.48 | 17.74 | 16.89 | 16.56 | 14.49 | 15.63 | 15.34 | 11.75 | 8.46 | 12.48 | 16.87 | 14.43 | 15.39 |
| Hmean 2–8 m | 5.41 | 5.62 | 5.38 | 5.20 | 5.33 | 5.79 | 5.93 | 5.13 | 5.41 | 6.12 | 5.62 | 6.38 | 5.93 |
| Hmean > 8 m | 18.79 | 18.25 | 17.24 | 17.40 | 15.39 | 16.08 | 15.68 | 13.45 | 11.03 | 13.64 | 17.08 | 15.27 | 16.01 |
| Pgroundlayer | 0.22 | 0.10 | 0.10 | 0.62 | 1.22 | 0.21 | 0.10 | 2.40 | 4.65 | 0.73 | 0.23 | 0.12 | 0.13 |
| Punderstorey | 1.90 | 4.00 | 2.95 | 6.67 | 8.65 | 4.41 | 3.48 | 19.50 | 33.49 | 14.88 | 1.79 | 9.35 | 6.08 |
| Poverstorey | 96.67 | 95.33 | 95.90 | 90.47 | 88.05 | 94.71 | 95.42 | 75.97 | 39.64 | 81.50 | 97.38 | 89.94 | 93.21 |
| FHD | 0.17 | 0.21 | 0.20 | 0.37 | 0.44 | 0.23 | 0.21 | 0.67 | 1.09 | 0.57 | 0.14 | 0.35 | 0.27 |
| VDR | 0.19 | 0.21 | 0.18 | 0.22 | 0.28 | 0.31 | 0.20 | 0.40 | 0.59 | 0.42 | 0.16 | 0.35 | 0.20 |

**Table S5.** Woodland structure metrics extracted per nest box from the 2012 point cloud data: all returns.

| **Metric Name** | **Box #2** | **Box #4** | **Box #6** | **Box #10** | **Box #11** | **Box #12** | **Box #13** | **Box #16** | **Box #17** | **Box #18** | **Box #19** | **Box #20** | **Box #21** |
| --- | --- | --- | --- | --- | --- | --- | --- | --- | --- | --- | --- | --- | --- |
| Vegetation cover | 92.13 | 94.65 | 88.71 | 90.55 | 92.15 | 93.23 | 90.84 | 91.98 | 72.83 | 88.53 | 92.54 | 92.54 | 90.98 |
| Canopy permeability | 33.59 | 34.19 | 36.58 | 33.81 | 25.22 | 31.93 | 34.67 | 28.48 | 23.33 | 31.86 | 38.64 | 28.07 | 37.92 |
| Canopy closure | 90.94 | 93.60 | 88.01 | 89.13 | 90.03 | 92.04 | 89.72 | 29.18 | 66.75 | 86.86 | 90.27 | 91.47 | 89.91 |
| H5 | 2.84 | 12.98 | 0.00 | 1.25 | 2.02 | 3.38 | 1.74 | 1.50 | 0.00 | 0.00 | 2.15 | 3.15 | 1.92 |
| H10 | 5.66 | 14.93 | 3.79 | 3.96 | 4.36 | 5.07 | 4.80 | 3.09 | 0.00 | 2.93 | 4.48 | 5.79 | 4.49 |
| H15 | 7.84 | 15.78 | 5.70 | 5.59 | 6.38 | 6.47 | 6.92 | 4.16 | 0.00 | 4.78 | 6.85 | 7.14 | 6.12 |
| H20 | 10.31 | 16.48 | 7.32 | 7.23 | 8.24 | 8.35 | 8.31 | 5.15 | 0.15 | 6.39 | 8.74 | 8.20 | 7.23 |
| H25 | 12.42 | 17.18 | 9.70 | 9.20 | 9.57 | 10.14 | 9.67 | 6.15 | 1.28 | 7.31 | 10.52 | 9.14 | 8.64 |
| H30 | 14.12 | 17.66 | 12.04 | 10.89 | 10.60 | 11.84 | 10.72 | 7.52 | 2.42 | 8.07 | 11.71 | 9.91 | 10.33 |
| H35 | 15.22 | 18.04 | 13.79 | 12.31 | 11.50 | 12.94 | 11.77 | 8.54 | 3.48 | 9.00 | 12.88 | 10.67 | 11.68 |
| H40 | 16.52 | 18.38 | 15.35 | 13.62 | 12.33 | 13.76 | 12.94 | 9.38 | 4.30 | 9.77 | 13.94 | 11.50 | 12.83 |
| H45 | 17.41 | 18.67 | 16.13 | 14.68 | 13.25 | 14.47 | 14.20 | 10.35 | 5.14 | 10.51 | 15.14 | 12.30 | 13.81 |
| H50 (Hmedian) | 17.95 | 18.96 | 16.57 | 15.56 | 14.12 | 15.05 | 15.11 | 11.07 | 5.95 | 11.28 | 16.20 | 13.11 | 14.68 |
| H55 | 18.48 | 19.22 | 16.92 | 16.79 | 14.98 | 15.54 | 15.67 | 11.75 | 6.64 | 12.00 | 16.85 | 14.20 | 15.45 |
| H60 | 19.05 | 19.48 | 17.23 | 17.72 | 15.99 | 16.07 | 16.09 | 12.44 | 7.30 | 12.78 | 17.32 | 15.40 | 15.98 |
| H65 | 19.48 | 19.73 | 17.49 | 18.41 | 16.66 | 16.57 | 16.44 | 13.11 | 8.26 | 13.38 | 17.70 | 16.37 | 16.42 |
| H70 | 19.86 | 20.01 | 17.73 | 18.96 | 17.19 | 16.99 | 16.74 | 13.79 | 9.27 | 13.90 | 18.06 | 17.18 | 16.77 |
| H75 | 20.23 | 20.32 | 17.97 | 19.40 | 17.65 | 17.41 | 17.06 | 14.43 | 10.08 | 14.67 | 18.38 | 17.80 | 17.12 |
| H80 | 20.58 | 20.67 | 18.26 | 19.82 | 18.12 | 17.86 | 17.40 | 15.26 | 10.90 | 15.66 | 18.69 | 18.49 | 17.48 |
| H85 | 21.07 | 21.16 | 18.64 | 20.29 | 18.64 | 18.39 | 17.75 | 16.40 | 11.95 | 16.83 | 19.00 | 19.42 | 17.92 |
| H90 | 21.78 | 21.82 | 19.19 | 20.89 | 19.25 | 19.31 | 18.22 | 17.66 | 13.08 | 18.33 | 19.39 | 20.49 | 18.60 |
| H95 | 23.63 | 23.57 | 21.26 | 23.17 | 21.45 | 23.33 | 20.20 | 20.15 | 15.78 | 21.63 | 21.10 | 23.24 | 20.42 |
| H100 (Hmax) | 2.84 | 12.98 | 0.00 | 1.25 | 2.02 | 3.38 | 1.74 | 1.50 | 0.00 | 0.00 | 2.15 | 3.15 | 1.92 |
| Hmean | 14.60 | 14.30 | 12.72 | 12.87 | 12.04 | 12.53 | 12.04 | 9.55 | 5.37 | 9.89 | 12.90 | 12.06 | 11.84 |

**Table S5.** *Cont.*

| **Metric Name** | **Box #2** | **Box #4** | **Box #6** | **Box #10** | **Box #11** | **Box #12** | **Box #13** | **Box #16** | **Box #17** | **Box #18** | **Box #19** | **Box #20** | **Box #21** |
| --- | --- | --- | --- | --- | --- | --- | --- | --- | --- | --- | --- | --- | --- |
| Hstd | 6.78 | 6.36 | 6.51 | 6.85 | 5.96 | 5.84 | 5.77 | 5.34 | 4.55 | 5.52 | 6.20 | 5.94 | 5.90 |
| Hmean > 2 m | 16.04 | 15.26 | 14.43 | 14.42 | 13.34 | 13.60 | 13.40 | 10.74 | 7.91 | 11.36 | 14.25 | 13.16 | 13.15 |
| Hmean 2–8 m | 5.34 | 5.49 | 5.33 | 5.20 | 5.17 | 5.31 | 5.50 | 5.05 | 5.19 | 5.68 | 5.52 | 5.80 | 5.56 |
| Hmean > 8 m | 17.53 | 17.02 | 16.26 | 16.46 | 14.88 | 15.37 | 14.80 | 13.05 | 10.98 | 13.21 | 15.83 | 14.65 | 15.02 |
| Pgroundlayer | 1.19 | 1.05 | 0.69 | 1.42 | 2.12 | 1.19 | 1.12 | 3.45 | 6.08 | 1.67 | 2.26 | 1.06 | 1.06 |
| Punderstorey | 11.18 | 14.26 | 14.70 | 16.20 | 14.22 | 16.20 | 13.54 | 25.62 | 35.30 | 21.37 | 13.35 | 15.34 | 17.77 |
| Poverstorey | 79.76 | 79.34 | 73.31 | 72.93 | 75.81 | 75.84 | 76.18 | 3.56 | 31.45 | 65.49 | 76.92 | 76.13 | 72.14 |
| FHD | 0.64 | 0.64 | 0.76 | 0.77 | 0.72 | 0.71 | 0.71 | 0.89 | 1.10 | 0.87 | 0.70 | 0.71 | 0.77 |
| VDR | 0.21 | 0.24 | 0.17 | 0.31 | 0.32 | 0.27 | 0.09 | 0.42 | 0.62 | 0.44 | 0.23 | 0.41 | 0.27 |

© 2015 by the authors; licensee MDPI, Basel, Switzerland. This article is an open access article distributed under the terms and conditions of the Creative Commons Attribution license (http://creativecommons.org/licenses/by/4.0/).
